# Supplementary material for: Novel Candidate Genes Associated with Hippocampal Oscillations
Source: PLoS One. 2011 Oct 31;6(10):e26586. doi: 10.1371/journal.pone.0026586 (PMC3204991; doi:10.1371/journal.pone.0026586)
Supplement: Table S3 — Description and IDs of first subset of phenotypes from the GeneNetwork phenotype database: physiological hippocampal traits. (XLS) [file pone.0026586.s022.xls]

| Description of the phenotype                                                                                              | GeneNetwork ID |
|---------------------------------------------------------------------------------------------------------------------------|----------------|
| Hippocampus mossy fiber pathway volume, total [units]                                                                     | 10362          |
| Central nervous system, morphology: Hippocampus mossy fiber pathway volume, CA4 (dentate gyrus) component [volume units]  | 10363          |
| Hippocampus mossy fiber pathway volume, suprapyramidal component (SPMF) [units]                                           | 10364          |
| Hippocampus mossy fiber pathway volume, intra- and infrapyramidal component (IIPMF) [units]                               | 10365          |
| Central nervous system, morphology: Hippocampus mossy fiber pathway, ratio of volume of CA4 to total MF [%]               | 10366          |
| Hippocampus mossy fiber pathway volume, fraction of suprapyramidal component relative to total volume [%]                 | 10367          |
| Hippocampus mossy fiber pathway volume, fraction of IIPMT relative to total volume [%]                                    | 10368          |
| Central nervous system, morphology: Hippocampus weight, bilateral, fixed and hand-dissected tissue [mg]                   | 10375          |
| Central nervous system, morphology: Hippocampus bilateral weight [mg]                                                     | 10376          |
| Central nervous system, morphology: Hippocampus granule cell density [ $n \times 10^3$ ]                                  | 10377          |
| Central nervous system, morphology: Hippocampus granule cell number, unilateral [ $n \times 10^3$ ]                       | 10378          |
| Central nervous system, morphology: Hippocampus volume, total [ $mm^3$ ]                                                  | 10456          |
| Central nervous system, morphology: Hippocampus proper volume [ $mm^3$ ]                                                  | 10457          |
| Central nervous system, morphology: Hippocampus pyramidal cell layer volume, unilateral [ $mm^3$ ]                        | 10458          |
| Central nervous system, morphology: Hippocampus dentate gyrus granule cell layer volume, unilateral [ $mm^3$ ]            | 10459          |
| Central nervous system, morphology: Hippocampus dentate gyrus volume [ $mm^3$ ]                                           | 10460          |
| High affinity choline uptake (concentration of $0.5 \times 10^{-6}M$ ) in hippocampus [pmole/4min/mg protein]             | 10607          |
| Central nervous system, morphology, aging: Polyglucosan bodies in the hippocampus of 18-month-old females [density]       | 10685          |
| Dorsal hippocampus volume residuals, age adjusted [ $mm^3$ ]                                                              | 10755          |
| Hippocampus, ventral hippocampus volume, age adjusted residuals (V2 Table 2A) [ $mm^3$ ]                                  | 10756          |
| Ventral hippocampus volume residuals, adjusted for differences in age and brain weight (from V3 Table 2A) [ $mm^3$ ]      | 10757          |
| Hippocampus volume, bilateral, in situ postmortem from high field MRI [ $mm^3$ ]                                          | 10895          |
| Iron level in hippocampus of males [ug/g]                                                                                 | 11027          |
| Iron level in hippocampus of females [ug/g]                                                                               | 11028          |
| Copper level in hippocampus of males [ug/g wet tissue]                                                                    | 11029          |
| Copper level in hippocampus of females [ug/g wet weight]                                                                  | 11030          |
| Zinc level in hippocampus of males [ug/g]                                                                                 | 11031          |
| Zinc level in hippocampus of females [ug/g]                                                                               | 11032          |
| Nrxn1 expression in hippocampus, principal component trait 1, January 2010; exon probe sets only from hippocampus Exon ST | 12557          |
| Hippocampus mossy fiber pathway volume, total without IMF (hilus + SMF) [ $mm^3$ ]                                        | 12587          |
| Hippocampus mossy fiber pathway volume, infrapyramidal (IMF) [ $mm^3$ ]                                                   | 12588          |
| Hippocampus mossy fiber pathway volume, suprapyramidal (SMF) [ $mm^3$ ]                                                   | 12589          |
| Hippocampus mossy fiber pathway volume, hilus [ $mm^3$ ]                                                                  | 12590          |
| Hippocampus mossy fiber pathway volume, total (hilus + IMF + SMF) [ $mm^3$ ]                                              | 12591          |
