# Supplementary material for: Novel Candidate Genes Associated with Hippocampal Oscillations
Source: PLoS One. 2011 Oct 31;6(10):e26586. doi: 10.1371/journal.pone.0026586 (PMC3204991; doi:10.1371/journal.pone.0026586)
Supplement: Table S5 — List of genes in a QTL for the trait Amplitude 1–45 Hz (ACSF), located at Chr4 40.937–49.610 Mb. (XLS) [file pone.0026586.s024.xls]

## Sheet: Sheet1
GeneNetwork Interval Analyst Table
view region : Chr 4 40.937000 - 49.601000 Mb
Index	Gene	Description	Chr	Start
1	Nfx1	nuclear transcription factor, X-box binding 1	4	40.918
2	Aqp7	aquaporin 7	4	40.9801
3	Aqp3	aquaporin 3	4	41.0398
4	Nol6	nucleolar protein family 6 (RNA-associated)	4	41.0615
5	Ube2r2	ubiquitin-conjugating enzyme E2R 2	4	41.0831
6	2310029O18Rik	RIKEN cDNA 2310029O18 gene	4	41.1245
7	Ubap2	ubiquitin-associated protein 2	4	41.1413
8	Wdr40a	WD repeat domain 40A	4	41.2383
9	Ubap1	ubiquitin-associated protein 1	4	41.296
10	Kif24	kinesin family member 24	4	41.3378
11	Nudt2	nudix (nucleoside diphosphate linked moiety X)-type motif 2	4	41.4122
12	AI464131	expressed sequence AI464131	4	41.4426
13	1110017D15Rik	RIKEN cDNA 1110017D15 gene	4	41.452
14	1700066J24Rik	RIKEN cDNA 1700066J24 gene	4	41.4645
15	2310028H24Rik	RIKEN cDNA 2310028H24 gene	4	41.466
16	Dnaic1	dynein, axonemal, intermediate chain 1	4	41.5168
17	1110065P19Rik	RIKEN cDNA 1110065P19 gene	4	41.5853
18	Cntfr	ciliary neurotrophic factor receptor	4	41.6045
19	2810432D09Rik	RIKEN cDNA 2810432D09 gene	4	41.6591
20	Dctn3	dynactin 3	4	41.6618
21	Arid3c	AT rich interactive domain 3C (BRIGHT-like)	4	41.6709
22	Oprs1	opioid receptor, sigma 1	4	41.6854
23	Galt	galactose-1-phosphate uridyl transferase	4	41.7021
24	Il11ra1	interleukin 11 receptor, alpha chain 1	4	41.7092
25	Ccl27	chemokine (C-C motif) ligand 27	4	41.7163
26	1700008B15Rik	RIKEN cDNA 1700008B15 gene	4	41.7201
27	LOC545608	hypothetical LOC545608	4	41.7201
28	4930466F19Rik	RIKEN cDNA 4930466F19 gene	4	41.7513
29	EG545605	predicted gene, EG545605	4	41.7591
30	2310040A07Rik	RIKEN cDNA 2310040A07 gene	4	41.8269
31	4933409K07Rik	RIKEN cDNA 4933409K07 gene	4	41.902
32	Ccl21c	chemokine (C-C motif) ligand 21c (leucine)	4	41.9855
33	RP23-388P16.3	interleukin 11 receptor, alpha chain 2-like	4	42.0296
34	Il11ra2	interleukin 11 receptor, alpha chain 2	4	42.0296
35	1700045I11Rik	RIKEN cDNA 1700045I11 gene	4	42.0416
36	Ccl19	chemokine (C-C motif) ligand 19	4	42.2485
37	RP23-304I1.2	hypothetical LOC545611	4	42.536
38	LOC100038993	similar to interleukin 11 receptor, alpha chain 2	4	42.6688
39	4930578G10Rik	RIKEN cDNA 4930578G10 gene	4	42.7491
40	Ccl21a	chemokine (C-C motif) ligand 21a	4	42.7864
41	Ccl21b	chemokine (C-C motif) ligand 21b	4	42.7864
42	B230220N19Rik	RIKEN cDNA B230220N19 gene	4	42.8429
43	BC049635	cDNA sequence BC049635	4	42.8809
44	N28178	expressed sequence N28178	4	42.9301
45	Dnajb5	DnaJ (Hsp40) homolog, subfamily B, member 5	4	42.966
46	1700022I11Rik	RIKEN cDNA 1700022I11 gene	4	42.9828
47	Vcp	valosin containing protein	4	42.9928
48	Fancg	Fanconi anemia, complementation group G	4	43.0158
49	Pigo	phosphatidylinositol glycan anchor biosynthesis, class O	4	43.0305
50	Stoml2	stomatin (Epb7.2)-like 2	4	43.0406
51	B230312A22Rik	RIKEN cDNA B230312A22 gene	4	43.0454
52	Unc13b	unc-13 homolog B (C. elegans)	4	43.0719
53	4930417M19Rik	RIKEN cDNA 4930417M19 gene	4	43.28
54	Rusc2	RUN and SH3 domain containing 2	4	43.3949
55	4833436C18Rik	RIKEN cDNA 4833436C18 gene	4	43.4399
56	Tesk1	testis specific protein kinase 1	4	43.4551
57	Cd72	CD72 antigen	4	43.4606
58	Sit1	suppression inducing transmembrane adaptor 1	4	43.495
59	RP23-195K8.6	hypothetical protein LOC622404	4	43.5063
60	E130306D19Rik	RIKEN cDNA E130306D19 gene	4	43.509
61	Car9	carbonic anhydrase 9	4	43.5199
62	Tpm2	tropomyosin 2, beta	4	43.5276
63	Tln1	talin 1	4	43.5444
64	Creb3	cAMP responsive element binding protein 3	4	43.5755
65	Gba2	glucosidase beta 2	4	43.5798
66	Rgp1	RGP1 retrograde golgi transport homolog (S. cerevisiae)	4	43.5916
67	RP23-191F22.4	hypothetical protein LOC100039672	4	43.5961
68	Npr2	natriuretic peptide receptor 2	4	43.6448
69	Spag8	sperm associated antigen 8	4	43.6646
70	Hint2	histidine triad nucleotide binding protein 2	4	43.6671
71	4930412F15Rik	RIKEN cDNA 4930412F15 gene	4	43.6725
72	4930500O05Rik	RIKEN cDNA 4930500O05 gene	4	43.6818
73	Olfr70	olfactory receptor 70	4	43.7079
74	Olfr71	olfactory receptor 71	4	43.7185
75	3830408D24Rik	RIKEN cDNA 3830408D24 gene	4	43.7401
76	5430416O09Rik	RIKEN cDNA 5430416O09 gene	4	43.7429
77	2900073C16Rik	RIKEN cDNA 2900073C16 gene	4	43.7609
78	A630077J23Rik	RIKEN cDNA A630077J23 gene	4	43.7647
79	Olfr159	olfactory receptor 159	4	43.7829
80	Olfr29-ps1	olfactory receptor 29, pseudogene 1	4	43.7943
81	Olfr156	olfactory receptor 156	4	43.8332
82	Olfr157	olfactory receptor 157	4	43.8476
83	Olfr155	olfactory receptor 155	4	43.8672
84	Reck	reversion-inducing-cysteine-rich protein with kazal motifs	4	43.8884
85	Glipr2	GLI pathogenesis-related 2	4	43.9706
86	Ccin	calicin	4	43.9964
87	Clta	clathrin, light polypeptide (Lca)	4	44.0255
88	Gne	glucosamine	4	44.0469
89	Rnf38	ring finger protein 38	4	44.1391
90	Melk	maternal embryonic leucine zipper kinase	4	44.3138
91	Pax5	paired box gene 5	4	44.5444
92	4930517J16Rik	RIKEN cDNA 4930517J16 gene	4	44.6822
93	5730488B01Rik	RIKEN cDNA 5730488B01 gene	4	44.7157
94	Zcchc7	zinc finger, CCHC domain containing 7	4	44.7694
95	A630057N01Rik	RIKEN cDNA A630057N01 gene	4	44.9306
96	D4Wsu132e	DNA segment, Chr 4, Wayne State University 132, expressed	4	44.937
97	Grhpr	glyoxylate reductase/hydroxypyruvate reductase	4	44.9943
98	Zbtb5	zinc finger and BTB domain containing 5	4	45.0041
99	1700055D18Rik	RIKEN cDNA 1700055D18 gene	4	45.0266
100	Polr1e	polymerase (RNA) I polypeptide E	4	45.0315
101	Fbxo10	F-box protein 10	4	45.0521
102	1110019J04Rik	RIKEN cDNA 1110019J04 gene	4	45.1181
103	Frmpd1	FERM and PDZ domain containing 1	4	45.1978
104	2900093L17Rik	RIKEN cDNA 2900093L17 gene	4	45.2476
105	Rg9mtd3	RNA (guanine-9-) methyltransferase domain containing 3	4	45.31
106	Exosc3	exosome component 3	4	45.3295
107	Wdr32	WD repeat domain 32	4	45.355
108	Mcart1	mitochondrial carrier triple repeat 1	4	45.4088
109	9230104K21Rik	RIKEN cDNA 9230104K21 gene	4	45.4191
110	9130208E07Rik	RIKEN cDNA 9130208E07 gene	4	45.42
111	Shb	src homology 2 domain-containing transforming protein B	4	45.4444
112	LOC100040557	hypothetical protein LOC100040557	4	45.6538
113	Gm829	gene model 829, (NCBI)	4	45.6965
114	Aldh1b1	aldehyde dehydrogenase 1 family, member B1	4	45.8119
115	Igfbpl1	insulin-like growth factor binding protein-like 1	4	45.8224
116	1300002K09Rik	RIKEN cDNA 1300002K09 gene	4	45.8618
117	E230008N13Rik	RIKEN cDNA E230008N13 gene	4	45.9032
118	Tdrd7	tudor domain containing 7	4	46.0003
119	Tmod1	tropomodulin 1	4	46.0521
120	BC057893	cDNA sequence BC057893	4	46.1276
121	AU014645	expressed sequence AU014645	4	46.1514
122	Xpa	xeroderma pigmentosum, complementation group A	4	46.1881
123	Foxe1	forkhead box E1 (thyroid transcription factor 2)	4	46.3571
124	5830415F09Rik	RIKEN cDNA 5830415F09 gene	4	46.3898
125	Hemgn	hemogen	4	46.4069
126	Anp32b	acidic nuclear phosphoprotein 32 family, member B	4	46.464
127	Nans	N-acetylneuraminic acid synthase (sialic acid synthase)	4	46.5022
128	Trim14	tripartite motif-containing 14	4	46.5197
129	Coro2a	coronin, actin binding protein 2A	4	46.5504
130	4930566K23Rik	RIKEN cDNA 4930566K23 gene	4	46.58
131	9030208C03Rik	RIKEN cDNA 9030208C03 gene	4	46.5862
132	BC005685	cDNA sequence BC005685	4	46.5997
133	Tbc1d2	TBC1 domain family, member 2	4	46.6173
134	Gabbr2	gamma-aminobutyric acid (GABA) B receptor 2	4	46.6768
135	Anks6	ankyrin repeat and sterile alpha motif domain containing 6	4	47.0286
136	Gm568	gene model 568, (NCBI)	4	47.0297
137	Galnt12	UDP-N-acetyl-alpha-D-galactosamine:polypeptide N-acetylgalactosaminyltransferase 12	4	47.1048
138	Col15a1	collagen, type XV	4	47.2209
139	Tgfbr1	transforming growth factor, beta receptor I	4	47.3662
140	Alg2	asparagine-linked glycosylation 2 homolog (yeast, alpha-1,3-mannosyltransferase)	4	47.4827
141	Sec61b	Sec61 beta subunit	4	47.4875
142	Nr4a3	nuclear receptor subfamily 4, group A, member 3	4	48.0641
143	Stx17	syntaxin 17	4	48.1378
144	Txndc4	thioredoxin domain containing 4 (endoplasmic reticulum)	4	48.2062
145	Invs	inversin	4	48.2927
146	C030004N09Rik	RIKEN cDNA C030004N09 gene	4	48.4406
147	Tex10	testis expressed gene 10	4	48.4438
148	5730528L13Rik	RIKEN cDNA 5730528L13 gene	4	48.5528
149	Tmeff1	transmembrane protein with EGF-like and two follistatin-like domains 1	4	48.5981
150	2310039E09Rik	RIKEN cDNA 2310039E09 gene	4	48.6764
151	4933437F24Rik	RIKEN cDNA 4933437F24 gene	4	48.9838
152	E130309F12Rik	RIKEN cDNA E130309F12 gene	4	49.0723
153	C730036D15Rik	RIKEN cDNA C730036D15 gene	4	49.3927
154	RP23-34B24.1	novel protein similar to bile acid-Coenzyme A: amino acid N-acyltransferase Baat	4	49.4602
155	AI132189	expressed sequence AI132189	4	49.4649
156	9030417H13Rik	RIKEN cDNA 9030417H13 gene	4	49.4996
157	Baat	bile acid-Coenzyme A: amino acid N-acyltransferase	4	49.5023
158	Mrpl50	mitochondrial ribosomal protein L50	4	49.5255
159	Zfp189	zinc finger protein 189	4	49.5341
160	Aldob	aldolase 2, B isoform	4	49.5489
161	2810432L12Rik	RIKEN cDNA 2810432L12 gene	4	49.5974
